# Supplementary material
Source: Research Square preprint supplement (doi:10.21203/rs.3.rs-9211815/v1)
Supplement: Supplementary file 1 [file 5e83b0672103cbdde93a0834.docx]

# Supplementary Figure 1

Some of the AMF Species identified from teff and wheat croplands.


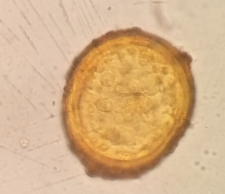

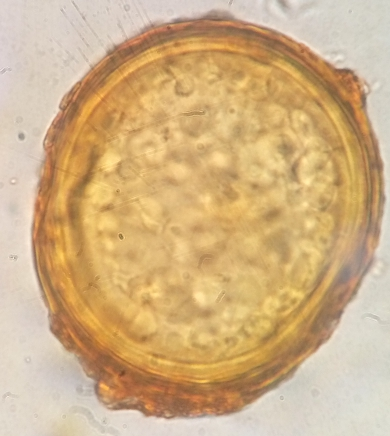


*AcaulosporalaevisAcaulosporalaevis*

*Acaulosporascrobiculatalaevis*


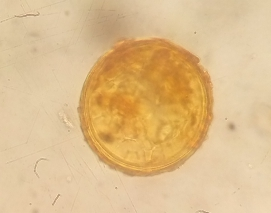


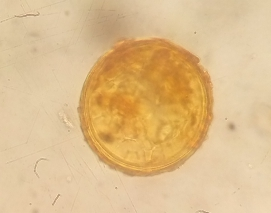


*Glomusfulvus*

*Glomusmagnicaule*


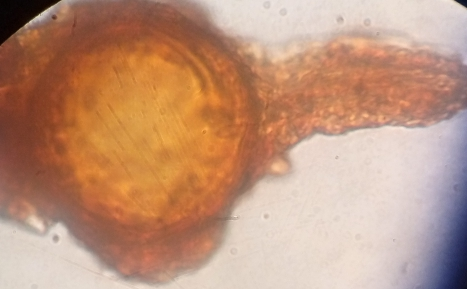

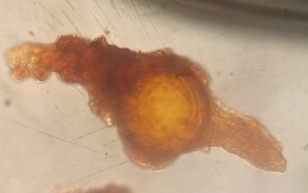


*Pacisporacorralloidea*

*Pacisporafranciscana*
