# Supplementary material
Source: Research Square preprint supplement (doi:10.21203/rs.3.rs-9211815/v1)
Supplement: Supplementary file 2 [file d808ea39d83d0309253b193e.docx]

**Supplementary information 1**

**DMU, College of NCS, Dept of Biology, acidity and Soil fertility management practices, Data collection Tools from Aneded, Awabel, Debre Elias, and Dejen**

**Soil samples collection (Teff and Wheat rhizosphere)**

1. Previous cropping history: What crop was growing last year on that particular field?

**Fertilizer and pesticide application**

1. Urea----------------------------------------------------------------------------------------yes/no
2. DAP-----------------------------------------------------------------------------------------yes/no
3. Compost-----------------------------------------------------------------------------------yes/no
4. Manure===============================================yes/no
5. Pesticide application--------------------------------------------------------------------- yes/no
6. Lime application---------------------------------------------------------------------------yes/no

**Agricultural practice**

1. Line sowing------------------------------------------------------------------------------------
2. Intercropping---------------------------------------------------------------------------------
3. Traditional sowing----------------------------------------------------------------------------
4. Mention if any---------------------------------------------------------------------------------

**Season when the crop was sown**

1. Irrigation--------------------------------------------------------------------------------
2. Rain feed-------------------------------------------------------------------------------
3. Mention if any_________________________________________

**Plant/Seeds (wheat, teff)**

Seed varieties

1. ------------------ 2. ------------------ 3. ----------------- 4. ---------------------

**VI.Soil type**

1. Black soil -----------------------------------------------------------------------------------
2. Red soil ------------------------------------------------------------------------------------

# Appendix II

Some of the AMF Species identified from the collected from study districts and some pictures during AMF extraction from soil.


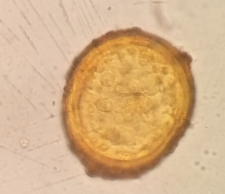

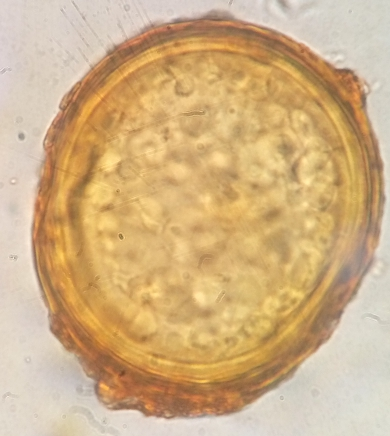


*Acaulospora laevis Acaulospora laevis*

*Acaulospora scrobiculata laevis*


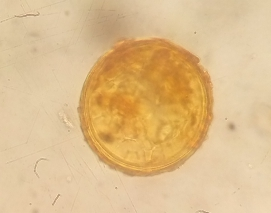


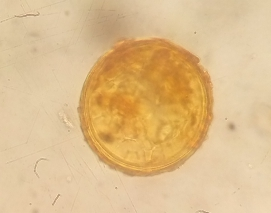


*Glomus fulvus*

*Glomus magnicaule*


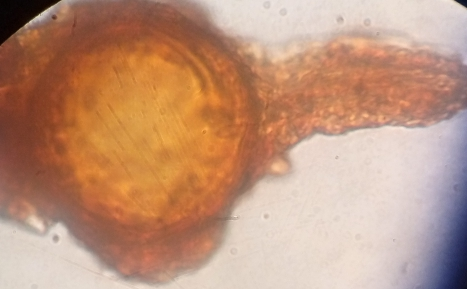

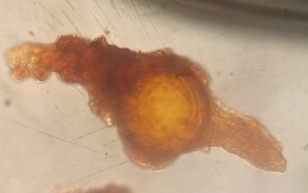


*Pacispora corralloidea*

*Pacispora franciscana*
